# Supplementary material
Source: PubMed Central journal article supplement (PMC4291383)
Supplement: AAC.04181-14_zac001153605so1.pdf [file AAC.04181-14_zac001153605so1.pdf]

## Detailed Laboratory Methods

### *DNA extraction and genotyping*

Genomic DNA was isolated from dried blood spots on Whatman 903 filter paper (46 samples) or from microscopy slides (2 samples) using the QIAamp DNA blood mini kit (QIAGEN, Valencia, CA) per manufacturer's instructions. Extraction from microscopy slides was performed according to Cnops et al. protocol [1]. Genus and species specific photo-induced electron transfer (PET)-PCR was used to confirm *P. falciparum* using a Stratagene Mx3005P (Agilent, Santa Clara, CA) [2].

Extracted DNA from dried blood spots collected on Day 0 and day of failure was used for genotyping four drug resistant markers (*pfmdr1*, chromosome 10 and 13 SNPs, and K13-propeller) and testing seven neutral microsatellite loci spanning six chromosomes (TA1, chromosome 6; poly  $\alpha$ , ch. 4; PfpK2, Ch. 12; TA109, ch. 6; and 2490, ch. 10; C2M24, ch. 2; C3M69, ch. 3) [3-5]. The microsatellite markers were PCR-amplified using primers and methods described previously [3, 4, 6]. Briefly, fluorescent labeled (HEX and FAM) PCR products were separated by capillary electrophoresis on an ABI 3130xl Genetic Analyzer and fragments were sized and scored using GeneMapper v3.7 (Applied Biosystems, Foster City, CA). When the sizes of alleles at a microsatellite marker differed by >2 base pairs they were considered different alleles. Previous laboratory studies have found that in polyclonal infections microsatellite alleles may occasionally be undetectable [7]. Due to the high prevalence of mixed strain (polyclonal) infections in highly endemic regions of Africa, we classified an infection as recrudescence if at least 6 of 7 neutral microsatellites shared alleles.

### *Chromosome 10 and 13*

**PCR for pyrosequencing.** The PCR and sequencing primers for the Chromosome 10 and Chromosome 13 SNPs were synthesized at the CDC Biotechnology Core Facility. The primer sequences are shown in Table S3. The primary and nested PCRs were generated in 50ul reaction volumes, which contained 1 ul DNA, 0.5 uM of forward and reverse PCR primers, 0.2mM deoxynucleotide triphosphates, 2.0mM MgCl<sub>2</sub>, 10X High Fidelity PCR Mix, and 2.6U/reaction High Fidelity Enzyme (Roche Applied Science, Penzberg, Germany). The primary PCR cycling conditions were 94°C for 2 min; 30 cycles with denaturation at 94°C for 15 s, annealing at 59°C for 30 s, and elongation at 72°C for 45 s; 1 cycle at 72°C for 8 min; and a final hold at 4°C. The thermal-cycling conditions for the nested reactions were the same as for the primary PCR reaction. PCR was performed using an Icyler Thermal cycler (Bio-Rad, Hercules, CA).

**Pyrosequencing reactions.** Single-stranded biotinylated PCR products were prepared for sequencing using the Pyrosequencing Vacuum Prep Tool (Biotage AB, Uppsala, Sweden). Three microliters of Streptavidin Sepharose HP beads (Amersham Biosciences, Uppsala, Sweden) was added to 40 ul binding buffer (10 mM Tris-HCl, pH 7.6, 2 M NaCl, 1 mM EDTA, 0.1% Tween 20) and mixed with 20 ul PCR product and 20 ul water for 10 min at room temperature using an Orbit Digital Shaker (Labnet International, Woodbridge, NJ). The beads containing the immobilized templates were captured on the filter probes after the vacuum was applied and then washed with 70% ethanol for 5 s, denaturation solution (0.2M NaOH) for 10 s, and washing buffer (10 mM Tris-acetate, pH 7.6) for 5 s. The vacuum was then released, and the beads were released into a PSQ96 Plate Low (Biotage AB, Uppsala, Sweden) containing 45 ul annealing buffer (20 mM Trisacetate, 2 mM MgAc<sub>2</sub>, pH 7.6) and 0.5 uM sequencing primer.

Pyrosequencing reactions were performed according to the manufacturer's instructions using the PSQ 96 SNP Reagent Kit (Biotage AB, Uppsala, Sweden), which contained the enzyme, substrate, and nucleotides. The assays were performed on the PSQ 96MA (Biotage AB, Uppsala, Sweden). The sample genotype was determined using the SNP Software (Biotage AB, Uppsala, Sweden).

### *Kelch K13*

**PCR reactions and Sanger sequencing.** The kelch K13 gene was amplified using a nested PCR approach; primers used are shown in Table S3. Two  $\mu\text{L}$  of genomic DNA was amplified using 0.5  $\mu\text{M}$  of each primer, 0.2mM dNTP, 3 and 2 mM  $\text{MgCl}_2$  for the primary and secondary reactions, respectively, and 1 U Expand High Fidelity Taq (Roche) . For the primary reaction the following cycling parameters were used: 5 min at 94°C , 40 cycles at 94°C for 30 sec, 60°C for 90s, 72°C for 90s, and final extension for 10 min at 72°C. For the nested PCR, 1 $\mu\text{L}$  of the primary PCR product was used as template. For the nested PCR reaction the following cycling parameters were used: 2 min at 94°C, 40 cycles at 94°C for 30 sec, 55°C for 30s, 72°C for 90s, and final extension for 10 min at 72°C. PCR products were confirmed using a 2% agarose gel electrophoresis and Gel red (Biotium, Hayward, CA). Sanger sequencing of PCR products was performed using ABI 3730 and analyzed with Geneious Pro R7 (Biomatters, Inc. , Auckland, New Zealand) to identify specific SNPs.

**Supplementary Table S1. Microsatellite data from 24 late treatment failures observed during therapeutic efficacy studies in Zaire and Uíge Provinces, Angola, 2013**

| Chromosome  | 6   |     |     |     | 4     |     | 12    |     |     | 6     |     | 10   |    | 2     |     | 3     |     |
|-------------|-----|-----|-----|-----|-------|-----|-------|-----|-----|-------|-----|------|----|-------|-----|-------|-----|
| Marker Name | TA1 |     |     |     | Polyα |     | PfPK2 |     |     | TA109 |     | 2490 |    | C2M34 |     | C3M69 |     |
| Sample ID   | 1   |     |     |     | 3     |     | 7     |     |     | 9     |     | 12   |    | 313   |     | 383   |     |
| A111        | 170 |     |     |     | 162   |     | 163   |     |     | 173   |     | 84   |    | 219   |     | 124   |     |
| A111d28     | 172 |     |     |     | 162   |     | 163   |     |     | 173   |     | 84   |    | 219   |     | 124   |     |
| A114        | 150 |     |     |     | 162   |     | 175   |     |     | 161   |     | 84   |    | 229   |     | 166   |     |
| A114d21     | 169 |     |     |     | 162   |     | 193   |     |     | 176   |     | 84   |    | 234   |     | 132   |     |
| A115        | 181 |     |     |     | 158   | 152 | 175   | 184 |     | 185   |     | 74   |    | 230   |     | 141   |     |
| A115d28     | 166 |     |     |     | 165   |     | 167   |     |     | 185   |     | 84   |    | 238   |     | 124   |     |
| A144        | 178 | 166 | 169 | 181 | 138   | 162 | 184   | 166 | 187 | 161   | 176 | 81   | 84 | 230   |     | 124   |     |
| A144d21     | 181 |     |     |     | 165   |     | 175   |     |     | 167   |     | 84   |    | 219   |     | 143   |     |
| A145        | 171 |     |     |     | 171   |     | 160   |     |     | 186   |     | 81   |    | 238   |     | 124   |     |
| A145d21     | 172 |     |     |     | 171   |     | 160   |     |     | 185   |     | 81   |    | 238   |     | 124   |     |
| A171        | 165 |     |     |     | 132   |     | 173   |     |     | 176   |     | 84   |    | 238   |     | 124   |     |
| A171d28     | 163 |     |     |     | 158   |     | 187   |     |     | 164   |     | 84   |    | 230   | 238 | 150   |     |
| B304        | 175 |     |     |     | 155   |     | 166   |     |     | 162   |     | 74   |    | 243   |     | 124   |     |
| B304d21     | 172 |     |     |     | 155   |     | 166   |     |     | 213   |     | 84   |    | 236   |     | 140   |     |
| B312        | 182 |     |     |     | 132   |     | 169   |     |     | 165   |     | 75   |    | 247   |     | 154   |     |
| B312d21     | 169 |     |     |     | 152   |     | 179   |     |     | 161   |     | 74   |    | 247   |     | 124   |     |
| B314        | 160 |     |     |     | 162   |     | 160   |     |     | 177   |     | 81   |    | 223   |     | 141   |     |
| B314d21     | 160 |     |     |     | 161   |     | 160   |     |     | 176   |     | 81   |    | 223   |     | 141   |     |
| B416        | 162 | 168 |     |     | 149   |     | 167   |     |     | 161   | 164 | 81   |    | 219   | 253 | 143   |     |
| B416d28     | 163 | 169 |     |     | 149   |     | 166   |     |     | 161   | 164 | 81   |    | 219   |     | 143   |     |
| B421        | 162 |     |     |     | 149   |     | 166   |     |     | 176   |     | 87   |    | 215   |     | 147   |     |
| B421d28     | 166 |     |     |     | 174   |     | 179   |     |     | 161   |     | 84   | 81 | 255   |     | 139   |     |
| B422        | 174 | 162 |     |     | 142   | 159 | 164   | 187 |     | 177   | 165 | 84   |    | 234   |     | 145   |     |
| B422d28     | 175 |     |     |     | 158   |     | 187   |     |     | 176   |     | 84   |    | 234   |     | 141   |     |
| B423        | 159 |     |     |     | 171   |     | 166   |     |     | 165   |     | 84   |    | 230   |     | 139   |     |
| B423d21     | 172 | 160 |     |     | 161   | 155 | 169   | 163 |     | 164   |     | 84   |    | 223   |     | 132   |     |
| B371        | 174 |     |     |     | 171   |     | 172   | 169 |     | 177   |     | 81   | 84 | 261   |     | 124   |     |
| B371d21     | 172 |     |     |     | 165   | 152 | 187   |     |     | 176   |     | 84   |    | 232   |     | 143   |     |
| B375        | 171 |     |     |     | 159   |     | 169   |     |     | 164   |     | 81   |    | 238   |     | 124   |     |
| B375d28     | 163 |     |     |     | 162   |     | 172   | 178 |     | 176   |     | 84   |    | 259   |     | 143   |     |
| B384        | 160 |     |     |     | 161   |     | 163   |     |     | 161   |     | 84   |    | 243   |     | 136   |     |
| B384d21     | 160 |     |     |     | 161   |     | 163   |     |     | 161   |     | 84   |    | 242   |     | 136   |     |
| B385        | 168 | 165 |     |     | 158   |     | 184   |     |     | 161   | 185 | 84   | 94 | 236   |     | 143   |     |
| B385d21     | 169 | 166 |     |     | 158   |     | 184   | 160 |     | 161   | 185 | 84   | 94 | 236   |     | 143   |     |
| B386        | 168 |     |     |     | 145   |     | 184   |     |     | 176   |     | 84   |    | 230   |     | 145   |     |
| B386d14     | 172 |     |     |     | 158   |     | 169   |     |     | 173   |     | 81   |    | 223   |     | 124   |     |
| B387        | 169 |     |     |     | 152   |     | 175   |     |     | 188   |     | 74   |    | 272   |     | 136   |     |
| B387d21     | 163 |     |     |     | 149   |     | 182   |     |     | 176   |     | 77   |    | 230   |     | 124   |     |
| B398        | 170 |     |     |     | 161   |     | 172   |     |     | 179   |     | 84   |    | 239   |     | 143   |     |
| B398d21     | 184 |     |     |     | 142   |     | 157   |     |     | 164   |     | 84   |    | 225   |     | 172   |     |
| B399        | 168 | 183 |     |     | 155   | 183 | 175   | 163 |     | 164   |     | 81   |    | 227   | 255 | 138   |     |
| B399d21     | 184 | 169 |     |     | 155   |     | 175   |     |     | 164   |     | 81   |    | 227   |     | 139   |     |
| B402        | 169 | 160 |     |     | 150   |     | 187   |     |     | 176   | 200 | 84   |    | 261   | 236 | 124   | 150 |
| B402d28     | 166 |     |     |     | 168   |     | 181   |     |     | 173   |     | 81   |    | 249   |     | 150   |     |

| Chromosome  | 6   | 4             | 12    | 6       | 10   | 2       | 3     |
|-------------|-----|---------------|-------|---------|------|---------|-------|
| Marker Name | TA1 | Poly $\alpha$ | PfPK2 | TA109   | 2490 | C2M34   | C3M69 |
| Sample ID   | 1   | 3             | 7     | 9       | 12   | 313     | 383   |
| B404        | 178 | 152 138       | 172   | 188     | 84   | 270     | 131   |
| B404d28     | 160 | 139           | 172   | 200 188 | 84   | 270 221 | 130   |
| C560        | 168 | 149           | 184   | 176     | 84   | 238     | 150   |
| C560d28     | 181 | 155           | 190   | 185     | 87   | 232     | 145   |

Reference Strains:

|     |     |     |     |     |    |     |     |
|-----|-----|-----|-----|-----|----|-----|-----|
| 3D7 | 183 | 152 | 169 | 173 | 81 | 262 | 172 |
| HB3 | 140 | 180 | 193 | 188 | 84 | 232 | 124 |

**Supplementary Table S2. Sequencing Primers for *pfmdr1***

| Gene          | Primer orientation,* name | Primer sequence                | Reference            |
|---------------|---------------------------|--------------------------------|----------------------|
| <i>pfmdr1</i> |                           |                                | Vinyaka et al., 2010 |
| Region 1      |                           |                                |                      |
| Primary       | F, AL6875                 | 5'-CCGTTTAAATGTTTACCTGCAC-3'   |                      |
|               | R, AL6876                 | 5'-TGGGGTATTGATTCGTTGCAC-3'    |                      |
| Secondary     | F, AL6877                 | 5'-GTATGTGCTGTATTATCAGGAG-3'   |                      |
|               | R, AL6878                 | 5'-AGCCTCTTCTATAATGGACATG-3'   |                      |
| Region 2      |                           |                                |                      |
| Primary       | F, AL6792                 | 5'-GCATTTAGTTCAGATGATGAAATG-3' |                      |
|               | R, AL6793                 | 5'-CCATATGGTCCAACATTTGTATC-3'  |                      |
| Secondary     | F, AL6794                 | 5'-TATGCATACTGTTATTAATTATGG-3' |                      |
|               | R, AL6795                 | 5'-TTCGATAAATTCATCTATAGCAG-3'  |                      |

\*F, forward; R, reverse.

**Supplementary Table S3. PCR and Sequencing Primers for Chromosome 10 and 13 SNPs, K13**

| Gene                               | Primer orientation,* name | Primer sequence                     |
|------------------------------------|---------------------------|-------------------------------------|
| <b>Chromosome 10 and 13 SNPs:</b>  |                           |                                     |
| <i>Chromosome 10</i>               |                           |                                     |
| Primary PCR                        | F, PCH10F1                | 5'- TGTATGAATAGGGATTGTCC-3'         |
|                                    | R, PCH10R1                | 5'- GCTATATCTTTTTTAATTTTGGCTCGTC-3' |
| Secondary PCR                      | F, PCH10F2                | 5'- GACGAGCAAAAATTAATAAAGATATAGC-3' |
|                                    | R, PCH10R2-BIOT           | 5'- TTAGTGAAAATTATATGTAATGGGTG-3'   |
| Sequencing Primer                  | F, Pyro10SeqF             | 5'- TTTTATAAAAGAACTATGCA-3'         |
| <i>Chromosome 13</i>               |                           |                                     |
| Primary PCR                        | F, PCH13F1                | 5'-GAATAAAGATGATATGAACGATG-3'       |
|                                    | R, PCH13R1                | 5'- CTAATTAAGGGATATGTAGCATC-3'      |
| Secondary PCR                      | F, PCH13F2                | 5'- AGGAAGACAACGGTGACGATCTA-3'      |
|                                    | R, PCH13R2-BIOT           | 5'- TTCTAAACAATACAACATTGCATGAC -3'  |
| Sequencing Primer                  | F, Pyro13SeqF             | 5'- TTAGTAAAGTAGATCATTCC-3'         |
| <b>Kelch K13:</b>                  |                           |                                     |
| Primary PCR                        | F, K13P1                  | 5'- GGAATCTGGTGGTAACAGC-3'          |
|                                    | R, K13R1                  | 5'- CGGAGTGACCAAATCTGGGA-3'         |
| Secondary PCR & Sequencing primers | F, K13S1                  | 5'- GTGAAAGTGAAGCCTTGTTG-3'         |
|                                    | R, K13S2                  | 5'-TTCATTTGTATCTGGTGAAAAG -3'       |

## Supplementary Information References

1. Cnops L, Van Esbroeck M, Bottieau E, Jacobs J: **Giemsa-stained thick blood films as a source of DNA for Plasmodium species-specific real-time PCR.** *Malar J* 2010, **9**:370.
2. Lucchi NW, Narayanan J, Karell MA, Xayavong M, Kariuki S, DaSilva AJ, Hill V, Udhayakumar V: **Molecular diagnosis of malaria by photo-induced electron transfer fluorogenic primers: PET-PCR.** *PLoS One* 2013, **8**:e56677.
3. Anderson TJ, Haubold B, Williams JT, Estrada-Franco JG, Richardson L, Mollinedo R, Bockarie M, Mokili J, Mharakurwa S, French N, et al: **Microsatellite markers reveal a spectrum of population structures in the malaria parasite Plasmodium falciparum.** *Mol Biol Evol* 2000, **17**:1467-1482.
4. Anderson TJ, Su XZ, Bockarie M, Lagog M, Day KP: **Twelve microsatellite markers for characterization of Plasmodium falciparum from finger-prick blood samples.** *Parasitology* 1999, **119 ( Pt 2)**:113-125.
5. McCollum AM, Mueller K, Villegas L, Udhayakumar V, Escalante AA: **Common origin and fixation of Plasmodium falciparum dhfr and dhps mutations associated with sulfadoxine-pyrimethamine resistance in a low-transmission area in South America.** *Antimicrob Agents Chemother* 2007, **51**:2085-2091.
6. Griffing SM, Mixson-Hayden T, Sridaran S, Alam MT, McCollum AM, Cabezas C, Marquino Quezada W, Barnwell JW, De Oliveira AM, Lucas C, et al: **South American Plasmodium falciparum after the malaria eradication era: clonal population expansion and survival of the fittest hybrids.** *PLoS One* 2011, **6**:e23486.
7. Greenhouse B, Myrick A, Dokomajilar C, Woo JM, Carlson EJ, Rosenthal PJ, Dorsey G: **Validation of microsatellite markers for use in genotyping polyclonal Plasmodium falciparum infections.** *Am J Trop Med Hyg* 2006, **75**:836-842.
